# Supplementary material for: How Many Patients with Type 2 Diabetes Meet the Inclusion Criteria of the Cardiovascular Outcome Trials with SGLT2 Inhibitors? Estimations from a Population Database in a Mediterranean Area
Source: Hindawi journal article supplement (doi:10.1155/2019/2018374), 2019-11-11
Supplement: f1 [file 2018374.f1.pdf]

**Supplementary Table 1.** Eligibility criteria of the three studied CVOTs completed for SGLT2i in T2D patients.

|                                | EMPA-REG OUTCOME<br>(empagliflozin / placebo)                                                                                                                                       | CANVAS<br>(canagliflozin / placebo)                                                                                                                                                                                                                                                                                                                                                                                                                                                                                      | DECLARE-TIMI 58<br>(dapagliflozin / placebo)                                                                                                                                                                                                                                                                                                                                                                                                            |
|--------------------------------|-------------------------------------------------------------------------------------------------------------------------------------------------------------------------------------|--------------------------------------------------------------------------------------------------------------------------------------------------------------------------------------------------------------------------------------------------------------------------------------------------------------------------------------------------------------------------------------------------------------------------------------------------------------------------------------------------------------------------|---------------------------------------------------------------------------------------------------------------------------------------------------------------------------------------------------------------------------------------------------------------------------------------------------------------------------------------------------------------------------------------------------------------------------------------------------------|
| <b>Age</b>                     | ≥18 years                                                                                                                                                                           | <ul style="list-style-type: none"> <li>• ≥30 years in SP</li> <li>• ≥50 years in PP</li> </ul>                                                                                                                                                                                                                                                                                                                                                                                                                           | <ul style="list-style-type: none"> <li>• ≥40 years in SP</li> <li>• ≥55 years (≥60 in women) in PP</li> </ul>                                                                                                                                                                                                                                                                                                                                           |
| <b>HbA1c</b>                   | <ul style="list-style-type: none"> <li>• If no glucose-lowering agents: 7.0%-9.0%</li> <li>• If glucose-lowering agents: 7.0%-10.0%</li> </ul>                                      | ≥7.0% - ≤10.5%                                                                                                                                                                                                                                                                                                                                                                                                                                                                                                           | 6.5%-12.0%                                                                                                                                                                                                                                                                                                                                                                                                                                              |
| <b>Main inclusion criteria</b> | <p><u>Established CVD:</u></p> <ul style="list-style-type: none"> <li>• Myocardial infarction</li> <li>• CAD</li> <li>• Unstable angina</li> <li>• Stroke</li> <li>• PAD</li> </ul> | <p><u>≥30 years with established CVD (SP):</u></p> <ul style="list-style-type: none"> <li>• Ischaemic heart disease</li> <li>• Myocardial infarction</li> <li>• Unstable angina</li> <li>• Significant carotid or PAD</li> </ul> <p><u>≥50 years with high risk of CVD: ≥2 CV risk factors (PP):</u></p> <ul style="list-style-type: none"> <li>• ≥10 years T2D duration</li> <li>• Hypertension*</li> <li>• Current smoker</li> <li>• Micro or Macroalbuminuria</li> <li>• HDL-c &lt;39 mg/dl (&lt;1 mmol/l)</li> </ul> | <p><u>≥40 years with established CVD (SP):</u></p> <ul style="list-style-type: none"> <li>• Ischaemic heart disease</li> <li>• Cerebrovascular disease</li> <li>• PAD</li> </ul> <p><u>High risk of CVD; ≥2 CV risk factors (PP):</u></p> <ul style="list-style-type: none"> <li>• <b>Age AND</b> at least 1 of: <ul style="list-style-type: none"> <li>• Dyslipidemia**</li> <li>• Hypertension†</li> <li>• Current tobacco use</li> </ul> </li> </ul> |
| <b>Main exclusion criteria</b> | eGFR <30 ml/min/1.73 m <sup>2</sup>                                                                                                                                                 | eGFR <30 ml/min/1.73 m <sup>2</sup>                                                                                                                                                                                                                                                                                                                                                                                                                                                                                      | eGFR <60 ml/min/1.73 m <sup>2</sup>                                                                                                                                                                                                                                                                                                                                                                                                                     |
|                                | BMI ≥45 kg/m <sup>2</sup>                                                                                                                                                           |                                                                                                                                                                                                                                                                                                                                                                                                                                                                                                                          |                                                                                                                                                                                                                                                                                                                                                                                                                                                         |

CAD, coronary artery disease; CVD, cardiovascular disease; eGFR, estimated glomerular fraction; HbA1c, glycated haemoglobin; HDL-c, high-density lipoprotein-cholesterol; PAD, peripheral artery disease; PP, primary prevention; SP, secondary prevention; T2D, type 2 diabetes

\*Systolic pressure >140 mmHg while on ≥1 hypertensive agents

\*\*low-density lipoprotein-cholesterol (LDL-c) ≥130 mg/dl or use of lipid-lowering therapies

†Blood pressure >140/90 mmHg or on anti-hypertensive therapy

**Supplementary Table 2.** ICD-10 codes for cardiovascular diseases considered in the study.

| Condition                                       | ICD-10 codes                                                        |
|-------------------------------------------------|---------------------------------------------------------------------|
| Acute myocardial infarction (<28 days)          | I21                                                                 |
| Old myocardial infarction                       | I25.2                                                               |
| Angor pectoris                                  | I20.8                                                               |
| Unstable angina                                 | I20.0                                                               |
| Coronary artery disease                         | I20-I25                                                             |
| Stroke                                          | I61, I62.x (except: I62.9), I63, I64, I65.x, I67, I69, G45, and G46 |
| Peripheral artery disease                       | I73, I73.8, I73.9, and I74                                          |
| Heart failure                                   | I50, I11.0, I13.0, and I13.2                                        |
| <b>Procedures</b>                               |                                                                     |
| Coronary revascularisation                      | Z95.5, Z95.8, Z95.9                                                 |
| Revascularisation of other vascular territories | I97.8, I97.9                                                        |
